# Supplementary material for: Smart self-defensive coatings with bacteria-triggered antimicrobial response for medical devices
Source: Royal Society of Chemistry journal article supplement (doi:10.1039/d4bm00936c), 2024-01-01

SUPPLEMENTARY MATERIAL FOR

## Smart self-defensive coatings with bacteria-triggered antimicrobial response for medical devices

Maria Antonia Cassa,<sup>a,b</sup> Piergiorgio Gentile,<sup>c</sup> Joel Girón-Hernández,<sup>d</sup> Gianluca Ciardelli<sup>a,b,e</sup> and Irene Carmagnola<sup>\*a,b</sup>

**a.** Politecnico di Torino, Department of Mechanical and Aerospace Engineering, Torino 10129, Italy.

**b.** Politecnico di Torino, Polito BIOMed Lab, Torino 10129, Italy

**c.** School of Engineering, Newcastle University, Newcastle upon Tyne NE1 7RU, UK

**d.** Department of Applied Sciences, Faculty of Health and Life Sciences, Northumbria University, Newcastle upon Tyne NE1 8ST, UK

**e.** National Research Council, Institute for Chemical and Physical Processes (CNR-IPCF), Pisa 56124, Italy

\* corresponding author [irene.carmagnola@polito.it](mailto:irene.carmagnola@polito.it)

Supplementary Figure S1. Block diagram of the review structure, going from the main topics of the sections into paragraphs and subparagraphs

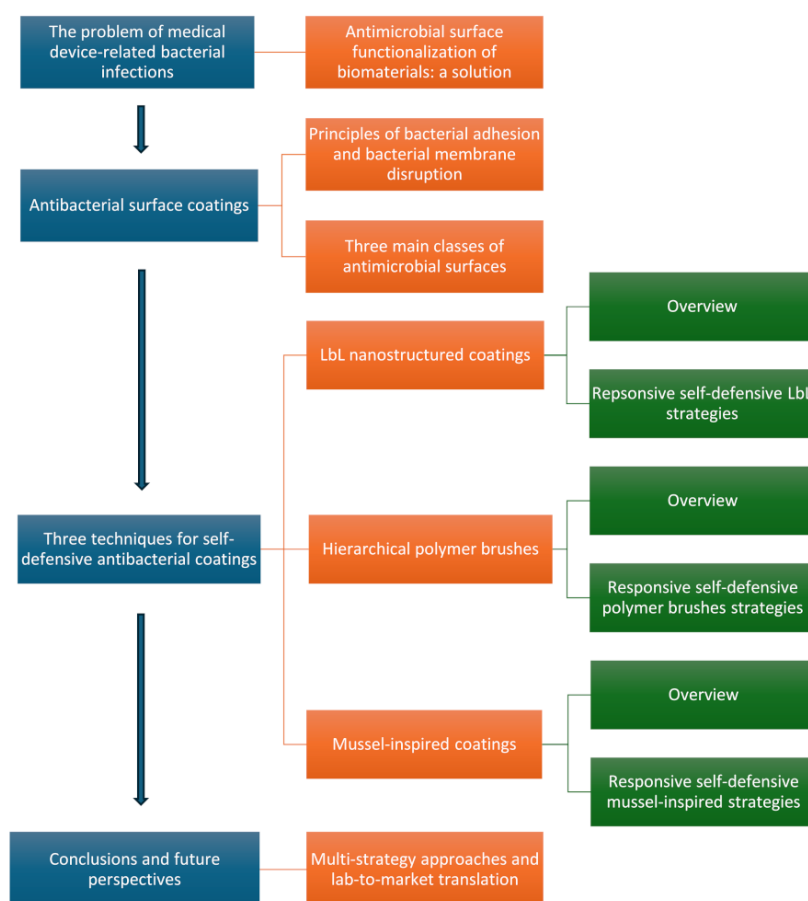

Supplement: d4bm00936c3.pdf [file d4bm00936c3.pdf]
