# Supplementary figures and images for: Smart self-defensive coatings with bacteria-triggered antimicrobial response for medical devices
Source: Royal Society of Chemistry journal article supplement (doi:10.1039/d4bm00936c), 2024-01-01

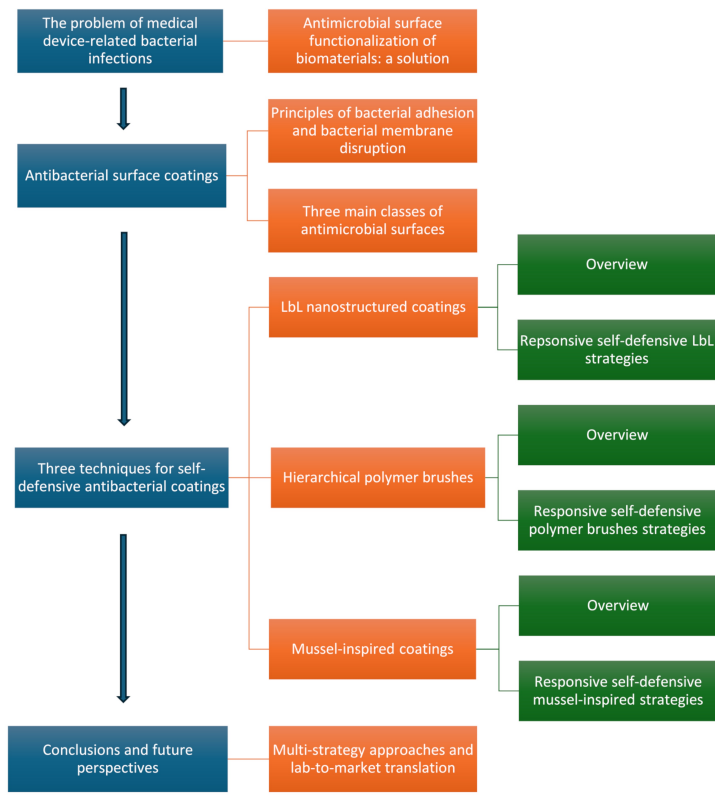

Supplement: d4bm00936c2.pdf [file d4bm00936c2.pdf]
